# Supplementary material for: Molecular Mapping and Genomics of Grain Yield in Durum Wheat: A Review
Source: Int J Mol Sci. 2020 Sep 24;21(19):7021. doi: 10.3390/ijms21197021 (PMC7582296; doi:10.3390/ijms21197021)
Supplement: Supplementary file 1 [file ijms-21-07021-s001.xlsx]

## Sheet: Supp. Table 1
Trait	Cross/population	Population size	Chr	Peak marker, interval marker	Consensus map position (cM, Maccaferri et al. 2015)	R2 (%)	Reference
PH	CIMMYT accessions	208	1B	1231191		9	[7]
PH	CIMMYT accessions	208	1B	1102235		7	[7]
GY	CIMMYT accessions	208	2A	1241179		8	[7]
TKW	CIMMYT accessions	208	2A	1069828		6.0 - 13	[7]
PH	CIMMYT accessions	208	2A	3020873		6.8	[7]
KNM	CIMMYT accessions	208	2A	100031178		7.0 - 9.0	[7]
KNM	CIMMYT accessions	208	2A	1091747		7.0 - 12	[7]
GY	CIMMYT accessions	208	2B	4989523		8	[7]
GY, TKW, PH, KNM	CIMMYT accessions	208	2B	100021740		9 (GY), 9 (TKW), 15 (PH), 11 (KNM)	[7]
PH	CIMMYT accessions	208	3A	100040320		11	[7]
PH	CIMMYT accessions	208	4A	100007802		11.3	[7]
PH	CIMMYT accessions	208	4A	1128188		7.1	[7]
PH	CIMMYT accessions	208	4B	2278417		10.0 - 18	[7]
PH, GY	CIMMYT accessions	208	5B	100042165		11 (PH), 8 (GY)	[7]
PH	CIMMYT accessions	208	5B	100031385		9	[7]
TKW	CIMMYT accessions	208	5B	1242652		6.8	[7]
GY	CIMMYT accessions	208	6A	1023970		7	[7]
GY	CIMMYT accessions	208	6B	100035367		8	[7]
GY	CIMMYT accessions	208	6B	1187838		8	[7]
PH	CIMMYT accessions	208	6B	100038677		9.8	[7]
PH	CIMMYT accessions	208	7A	1134569		7.1	[7]
PH	CIMMYT accessions	208	7A	1380232		7.2	[7]
KNM	CIMMYT accessions	208	7B	1029487		6.5	[7]
PH	Kofa × Svevo	249	2A	gwm1136 – cfd251	195.5	3.1	[14]
PH	Kofa × Svevo	249	2B	gwm1027 – wmc361	183.1	7.4	[14]
GY	Kofa x Svevo	249	3A	wmc664 – gwm1159	65.8	8.8	[14]
PH	Kofa × Svevo	249	3A	gwm1159 – gwm10	77	5.6	[14]
PH, GY	Kofa × Svevo	249	3B	barc133 – gwm493*	5	14.2 (PH), 15.5 (GY)	[14]
GY	Kofa x Svevo	249	3B	gwm685*	73.5	4.1	[14]
GY	Kofa x Svevo	249	3B	ksum157 – wmc326	143.8	4.7	[14]
GY	Kofa x Svevo	249	6B	gwm219 – gwm1486	116.8	8.5	[14]
PH	Kofa × Svevo	249	7A	wPt-1424 – wPt-6019		7.3	[14]
GY	Kofa x Svevo	249	7A	gwm573 – barc29		8	[14]
GY	Kofa x Svevo	249	7B	gwm569 – barc1005	3.4	4.1	[14]
GY	Kofa x Svevo	249	7B	barc1005 – gwm400	12.3	7.9	[14]
GY	Kofa x Svevo	249	7B	gwm333 – wmc396	86.2	6.9	[14]
GY	Kofa x Svevo	249	7B	barc32*	188	4.4	[14]
GY	Canadian Durum Wheat Germplasm	192	1B	hap_1B_8		5.2	[15]
PH	Canadian Durum Wheat Germplasm	192	2A	hap_2A_1		15	[15]
GY	Canadian Durum Wheat Germplasm	192	2B	hap_2B_2		6.5	[15]
GY	Canadian Durum Wheat Germplasm	192	2B	hap_2B_7		13.4	[15]
PH, GY	Canadian Durum Wheat Germplasm	192	4A	hap_4A_5		43.9 (PH), 38.5 (GY)	[15]
GY	Canadian Durum Wheat Germplasm	192	4A	hap_4A_6		11.4	[15]
PH, GY	Canadian Durum Wheat Germplasm	192	4B	hap_4B_1		30 (PH), 14.4 (GY)	[15]
PH	Canadian Durum Wheat Germplasm	192	4B	hap_4B_2		17.9	[15]
PH	Canadian Durum Wheat Germplasm	192	5A	hap_5A_1		2.3	[15]
PH	Canadian Durum Wheat Germplasm	192	7A	hap_7A_10		6	[15]
PH	Canadian Durum Wheat Germplasm	192	7B	hap_7B_5		3.6	[15]
TKW	worldwide collection	150	3A	BE425919_3_A_592		5.9	[17]
KW	worldwide collection	150	3B	BE495175_3_B_Y_443		7.2	[17]
KW	worldwide collection	150	4B	BG604507_4_B_383		8.56	[17]
TKW, PH	worldwide collection	150	4B	BE405269_4_B_84		4.7 (TKW), 5.3 - 7 (PH)	[17]
TKW	worldwide collection	150	4B	BE442666_4_B_Y_327		6.73	[17]
KL, TKW	worldwide collection	150	5A	BE500291_5_A_37		5.8 - 12.6 (KL), 5.1 - 6.3 (TKW)	[17]
KL	worldwide collection	150	5A	BG274985_5_A_Y_267		4.7	[17]
KL	worldwide collection	150	5A	BE403211_5_A_Y_601		9.3	[17]
KL, SLNS	worldwide collection	150	5B	BQ168780_5_B_995		7.1 - 8.5 (KL), 7.8 (SLNS)	[17]
KW, TKW	worldwide collection	150	5B	CD452967_5_B_Y_229		8.3 (KW), 7.1 (TKW)	[17]
KW	worldwide collection	150	6A	BE498763_6_A_Y_318		7.1	[17]
TKW	worldwide collection	150	6A	BE636872_6_A_119		8.2	[17]
KW	worldwide collection	150	6B	BF291774_6_B_519		7.3	[17]
KL, TKW	worldwide collection	150	7A	BF483039_7_A_Y_202		6.9 (KL), 7.5 (TKW)	[17]
KW	worldwide collection	150	7A	BE497375_7_A_Y_191		6.2	[17]
KW	worldwide collection	150	7A	BE637838_7_A_Y_208		7.4	[17]
KW	worldwide collection	150	7A	BE499652_7_A_Y_391		7.3	[17]
KW	worldwide collection	150	7B	BF292193_7_B_N_78		5.09	[17]
KW	worldwide collection	150	7B	BE499248_7_B_Y_63		8.57	[17]
KNS	Omrabi5 x Belikh2	114	1A	wmc312	83.7	6	[18]
KNS, TKW	Omrabi5 x Belikh2	114	1B	wmc419	67.4	6 (KNS), 8 (TKW)	[18]
TKW	Omrabi5 x Belikh2	114	1B	gwm153	114	6	[18]
TKW	Omrabi5 x Belikh2	114	1B	gwm268	118.9	9	[18]
KNS	Omrabi5 x Belikh2	114	1B	wmc156		11	[18]
KNS	Omrabi5 x Belikh2	114	1B	wmc548		8	[18]
GY	Omrabi5 x Belikh2	114	1B	gwm784		6	[18]
PH	Omrabi5 x Belikh2	114	2A	gwm71	40.1	6	[18]
TKW, GY	Omrabi5 x Belikh2	114	2A	gwm726		8 (TKW), 9 (GY)	[18]
GY	Omrabi5 x Belikh2	114	2A	gwm895		7.0 - 8.0	[18]
PH	Omrabi5 x Belikh2	114	2B	wmc597	54.9	7	[18]
PH	Omrabi5 x Belikh2	114	2B	gwm972		6	[18]
PH	Omrabi5 x Belikh2	114	3A	barc57	5.6	6	[18]
PH	Omrabi5 x Belikh2	114	3A	barc294	7.2	9	[18]
KNS, GY	Omrabi5 x Belikh2	114	3A	barc45	43.4	10 (KNS), 7 (GY)	[18]
KNS	Omrabi5 x Belikh2	114	3A	wmc50	49.7	10	[18]
KNS	Omrabi5 x Belikh2	114	3B	gwm685*	73.5	10	[18]
KNS	Omrabi5 x Belikh2	114	3B	gwm299*	192.1	8	[18]
GY	Omrabi5 x Belikh2	114	3B	gwm547	209.3	6.0 - 11	[18]
KNS	Omrabi5 x Belikh2	114	3B	gwm625		6	[18]
PH	Omrabi5 x Belikh2	114	4B	barc193	22.5	8.0 - 10	[18]
PH	Omrabi5 x Belikh2	114	4B	gwm925		9.0 - 22	[18]
KNS	Omrabi5 x Belikh2	114	4B	wmc428		9	[18]
TKW	Omrabi5 x Belikh2	114	4B	gwm1167		12	[18]
PH, TKW	Omrabi5 x Belikh2	114	4B	gwm710b		10 (PH), 9.0 -10 (TKW)	[18]
KNS	Omrabi5 x Belikh2	114	5A	gwm154	28.4	8	[18]
PH	Omrabi5 x Belikh2	114	5A	gwm129	48.8	6	[18]
GY	Omrabi5 x Belikh2	114	5A	barc165	73.6	7	[18]
TKW	Omrabi5 x Belikh2	114	5A	gwm1236	96.1	7.0 - 12	[18]
PH, TKW	Omrabi5 x Belikh2	114	5A	gwm126	191.2	9 (PH), 10 (TKW)	[18]
PH	Omrabi5 x Belikh2	114	5A	barc261		8	[18]
PH	Omrabi5 x Belikh2	114	5A	gwm995		10	[18]
GY	Omrabi5 x Belikh2	114	5A	gwm1171b		30	[18]
KNS	Omrabi5 x Belikh2	114	5B	gwm540	38.6	7	[18]
TKW	Omrabi5 x Belikh2	114	5B	barc128	54.7	5	[18]
KNS, GY	Omrabi5 x Belikh2	114	5B	gwm1043	103.8	7.0 - 33 (KNS), 9 (GY)	[18]
KNS	Omrabi5 x Belikh2	114	5B	barc232	146.3	11	[18]
KNS	Omrabi5 x Belikh2	114	5B	barc243	180.5	9	[18]
KNS	Omrabi5 x Belikh2	114	5B	gwm1072		7.0 - 9.0	[18]
PH	Omrabi5 x Belikh2	114	6A	gwm4608		10	[18]
TKW	Omrabi5 x Belikh2	114	6B	barc178	112.9	8	[18]
TKW	Omrabi5 x Belikh2	114	6B	gwm889	114.1	9	[18]
GY	Omrabi5 x Belikh2	114	6B	gwm1199		8	[18]
GY	Omrabi5 x Belikh2	114	6B	gwm963a		7	[18]
PH	Omrabi5 x Belikh2	114	7A	wmc488*		6	[18]
TKW	Omrabi5 x Belikh2	114	7A	wmc603		5	[18]
TKW	Omrabi5 x Belikh2	114	7A	gwm332		10	[18]
PH	Omrabi5 x Belikh2	114	7B	gwm112	114.9	9	[18]
PH	Omrabi5 x Belikh2	114	7B	wmc517	137.4	16	[18]
TKW	Omrabi5 x Belikh2	114	7B	barc258	142.6	9	[18]
KNS	Omrabi5 x Belikh2	114	7B	wmc218		7	[18]
GY	Omrabi5 x Belikh2	114	7B	barc276		8.0 - 9.0	[18]
KW	Ethiopian landraces and modern varieties	192	2A	IWB72154	136	6.8	[30]
KW	Ethiopian landraces and modern varieties	192	2A	IWB23912	208.7	5.5	[30]
KL	Ethiopian landraces and modern varieties	192	2B	IWB3865	108.9	6.1	[30]
KL	Ethiopian landraces and modern varieties	192	4B	IWB9672	66.43	6.8	[30]
KL	Ethiopian landraces and modern varieties	192	5A	IWB43493	72.7	5.8	[30]
KW	Ethiopian landraces and modern varieties	192	5A	IWB46350	84.7	6.6	[30]
KL	Ethiopian landraces and modern varieties	192	6A	IWB67412	1	5.8	[30]
KL	Ethiopian landraces and modern varieties	192	7B	IWA2568	20.75	5.9	[30]
KW	Ethiopian landraces and modern varieties	192	7B	IWB36189	66.3	5.6	[30]
KW	Iran_249 x Zardak	118	1B	IWB6024	48.9	27.7	[32]
TKW	Iran_249 x Zardak	118	1B	barc181	53.4	22.5	[32]
TKW	Iran_249 x Zardak	118	2B	IWB8102, IWB64964	87.4	10	[32]
KL	Iran_249 x Zardak	118	2B	IWB36462, IWB21339	109.2	8.47 - 9.4	[32]
KL	Iran_249 x Zardak	118	2B	IWB79366		7.1	[32]
KW	Iran_249 x Zardak	118	3A	IWB79044 - IWB72436		9.1	[32]
TKW	Iran_249 x Zardak	118	3B	IWB23324, IWB73987	188.2	17.6	[32]
KL	Iran_249 x Zardak	118	4A	IWB34478	162.8	13.1 - 30.3	[32]
KL	Iran_249 x Zardak	118	4A	IWB77998 - IWB22203		8.7 - 9.9	[32]
KL	Iran_249 x Zardak	118	4B	IWB10172		8.69 - 11.28	[32]
KW	Iran_249 x Zardak	118	5A	IWB73058, IWB66717	138.3	15.2	[32]
TKW	Iran_249 x Zardak	118	5B	IWB68077	65.5	22.36	[32]
TKW, KW	Iran_249 x Zardak	118	5B	gwm499	74.9	12.27 - 15.21 (TKW), 18.45 (KW)	[32]
KL	Iran_249 x Zardak	118	5B	IWB73180 - IWB71748	167	12.1	[32]
KW	Iran_249 x Zardak	118	6A	IWB44862 - IWB40855	88.2	19.6	[32]
KL	Iran_249 x Zardak	118	6B	IWB1197 - IWB22066	4.8	18	[32]
KL	Iran_249 x Zardak	118	6B	IWB17476	15.2	27.4	[32]
KL	Iran_249 x Zardak	118	6B	IWB36565 - IWB79174	89.7	10.8	[32]
KL	Iran_249 x Zardak	118	6B	IWB73404, IWB73405	104	18.2	[32]
KL	Iran_249 x Zardak	118	6B	IWB81411 - IWB27533		14.7	[32]
KL	Iran_249 x Zardak	118	7B	IWB60292	120.4	16.4 - 19.1	[32]
SNM	Ostegata x Massara-1	151	1B	gwm11	37.1	6.4	[33]
TKW	Ostegata x Massara-1	151	3B	gwm389	0	10.9	[33]
TKW	Ostegata x Massara-1	151	3B	gwm299*	192.1	10.2	[33]
SNM, TKW	Ostegata x Massara-1	151	3B	barc101		49.5 (SNM), 45.2 (TKW)	[33]
SNM	Ostegata x Massara-1	151	5B	wmc28		6.1	[33]
TKW	Ostegata x Massara-1	151	6A	cfa2114		18.6	[33]
TKW	Ciccio x Svevo	120	1B	barc8 – CA679329a	25.7	20.8	[34]
TKW	Ciccio x Svevo	120	2A	wmc630b – wmc453		18.7	[34]
TKW	Ciccio x Svevo	120	3A	wmc527b – wmc428	82.8	18.3	[34]
TKW	Ciccio x Svevo	120	3B	gwm389 – D_521287	0	20.7	[34]
TKW	Ciccio x Svevo	120	4B	D_310555 – gwm251		19.4	[34]
TKW	Ciccio x Svevo	120	6B	wPt-3581 – barc178	101.1	17.4	[34]
TKW	Ciccio x Svevo	120	7B	gwm333 – D_520428	86.2	13.1	[34]
GY	PDW233 x Bhalegaon 4	140	1B	gwm268 – barc188	118.9	10.3	[35]
TKW	PDW233 x Bhalegaon 4	140	2B	gwm429 – ubc812.2	52.3	23.7	[35]
SLNS	PDW233 x Bhalegaon 4	140	4A	psp3009.4 – wmc48.1		7.7	[35]
SLNS	PDW233 x Bhalegaon 4	140	4A	wmc661 – cfa2158.2		16.5	[35]
TKW	PDW233 x Bhalegaon 4	140	4B	wmc617 – Rht-B1	16	19.7	[35]
TKW	PDW233 x Bhalegaon 4	140	4B	barc340 – gwm165.2	55.8	12.1	[35]
GY	PDW233 x Bhalegaon 4	140	4B	barc163 – cfd39.1	81.5	11.1	[35]
SLNS	PDW233 x Bhalegaon 4	140	4B	cfd39 – gwm6.1	82.3	18.7	[35]
TKW	PDW233 x Bhalegaon 4	140	4B	Rht-B1 – gwm368		14.7	[35]
GY	PDW233 x Bhalegaon 4	140	6A	wmc256 – barc118		7.6	[35]
SLNS	PDW233 x Bhalegaon 4	140	7A	barc219 – cfa2028		17.4	[35]
TKW	PDW233 x Bhalegaon 4	140	7A	cfa2174 – wmc17		7.9	[35]
TKW	Mediterranean landraces	172	1A	wPt-4676	0		[36]
TKW	Mediterranean landraces	172	1A	wPt-0011, wPt-8882	96.4		[36]
KNM	Mediterranean landraces	172	1A	wPt-2847	110.9		[36]
SNM	Mediterranean landraces	172	1B	wPt-5385	28.9		[36]
KNM	Mediterranean landraces	172	1B	wPt-2389	53.9		[36]
TKW	Mediterranean landraces	172	1B	wPt-3451	54.1		[36]
PH	Mediterranean landraces	172	2A	wPt-2696*	211.5		[36]
SNM	Mediterranean landraces	172	2A	wPt-7649	212.1		[36]
PH	Mediterranean landraces	172	2B	wPt-1140	121.9		[36]
TKW	Mediterranean landraces	172	2B	wPt-2293	154.6		[36]
GY	Mediterranean landraces	172	3B	wPt-1349	36.6		[36]
KNM	Mediterranean landraces	172	3B	wPt-1159	55		[36]
GY	Mediterranean landraces	172	3B	wPt-6047	86.6		[36]
PH	Mediterranean landraces	172	3B	wPt-2491	176		[36]
TKW	Mediterranean landraces	172	3B	wPt-0990	183.6		[36]
PH	Mediterranean landraces	172	4A	wPt-7939	134		[36]
TKW	Mediterranean landraces	172	4B	wPt-8892	40.1		[36]
GY	Mediterranean landraces	172	4B	wPt-6123 - wPt-5497	43.9		[36]
TKW	Mediterranean landraces	172	4B	wPt-6123	43.9		[36]
PH	Mediterranean landraces	172	4B	wPt-6209	75.8		[36]
KNM	Mediterranean landraces	172	4B	rPt-6847	82.7		[36]
SNM	Mediterranean landraces	172	6A	wPt-5633, wPt-1377	-1.5		[36]
PH	Mediterranean landraces	172	6B	wPt-1437	21.9		[36]
TKW	Mediterranean landraces	172	6B	wPt-5256	27.2		[36]
SNM	Mediterranean landraces	172	6B	wPt-0052	45.2		[36]
PH	Mediterranean landraces	172	6B	wPt-2162	146		[36]
GY, KNM	Mediterranean landraces	172	7A	wPt-5092	-0.4		[36]
KNM	Mediterranean landraces	172	7A	wPt-6842	137.2		[36]
PH	Mediterranean landraces	172	7B	wPt-5343	155		[36]
KNM	Mediterranean landraces	172	7B	wPt-2356	173.7		[36]
PH	Mediterranean landraces	172	7B	wPt-5138	190.2		[36]
SNM	Four RIL populations from ICARDA’s elite lines	576	1A	Icr_6218		8	[37]
TKW	Four RIL populations from ICARDA’s elite lines	576	1B	Icr_6388		7.7	[37]
TKW	Four RIL populations from ICARDA’s elite lines	576	1B	c1B.loc125		15.9	[37]
KW	worldwide collection	150	2A	BE517872_2_A_N_504		7.1	[37]
GY	Four RIL populations from ICARDA’s elite lines	576	2B	Icr_7246		13.4	[37]
GY	Four RIL populations from ICARDA’s elite lines	576	2B	Icr_18720		6.2	[37]
TKW	Four RIL populations from ICARDA’s elite lines	576	2B	c2B.loc125		8.6	[37]
GY	Four RIL populations from ICARDA’s elite lines	576	2B	Icr_687		4.8	[37]
SNM	Four RIL populations from ICARDA’s elite lines	576	3B	Icr_5915		13.2	[37]
PH	Four RIL populations from ICARDA’s elite lines	576	4A	Icr_21319		4.2	[37]
GY	Four RIL populations from ICARDA’s elite lines	576	4A	c4A.loc33		5.1	[37]
GY	Four RIL populations from ICARDA’s elite lines	576	4A	Icr_17289		19.3	[37]
PH	Four RIL populations from ICARDA’s elite lines	576	4A	Icr_1963		14.1	[37]
PH	Four RIL populations from ICARDA’s elite lines	576	4B	c4B.loc19		10	[37]
GY	Four RIL populations from ICARDA’s elite lines	576	4B	Icr_987		9.4	[37]
PH	Four RIL populations from ICARDA’s elite lines	576	4B	Icr_7052		32.7	[37]
TKW	Four RIL populations from ICARDA’s elite lines	576	4B	Icr_16461		9.3	[37]
GY	Four RIL populations from ICARDA’s elite lines	576	5B	Icr_15349		7.3	[37]
PH	Four RIL populations from ICARDA’s elite lines	576	5B	c5B.loc116		3.9	[37]
GY	Four RIL populations from ICARDA’s elite lines	576	5B	c5B.loc121		6	[37]
PH	Four RIL populations from ICARDA’s elite lines	576	5B	Icr_20534		8.4	[37]
SNM	Four RIL populations from ICARDA’s elite lines	576	5B	Icr_2977		6.6	[37]
TKW	Four RIL populations from ICARDA’s elite lines	576	6A	Icr_15049		9.5	[37]
TKW	Four RIL populations from ICARDA’s elite lines	576	6B	c6B.loc6		4.7	[37]
PH	Four RIL populations from ICARDA’s elite lines	576	6B	Icr_9314		15.8	[37]
SNM	Four RIL populations from ICARDA’s elite lines	576	6B	Icr_17674		10.9	[37]
TKW	Four RIL populations from ICARDA’s elite lines	576	7A	Icr_5226		10.4	[37]
GY	Four RIL populations from ICARDA’s elite lines	576	7A	Icr_16322.		4.3	[37]
GY	Four RIL populations from ICARDA’s elite lines	576	7B	Icr_14524		11.7	[37]
KNSL, SLNS	H52 (T. dicoccoides) x Langdon	150	1B	gwm153 – gwm259a	114	12.2 (KNSL), 12.7 (SLNS)	[38]
TKW	H52 (T. dicoccoides) x Langdon	150	1B	gwm359b – gwm636b		8.6	[38]
KNSL, TKW	H52 (T. dicoccoides) x Langdon	150	2A	gwm294	154.1	14.1 (KNSL), 19.5 (TKW)	[38]
KNSL	H52 (T. dicoccoides) x Langdon	150	3A	gwm374b – gwm32		10.1	[38]
TKW	H52 (T. dicoccoides) x Langdon	150	4A	gwm165 – gwm637	62.6	14.2	[38]
KNS	H52 (T. dicoccoides) x Langdon	150	5A	gwm154	28.4	40.1	[38]
KNSL	H52 (T. dicoccoides) x Langdon	150	5A	gwm154	28.4	38.8	[38]
SLNS	H52 (T. dicoccoides) x Langdon	150	5A	gwm154	28.4	32.6	[38]
PH	H52 (T dicoccoides) × Langdon	150	5A	gwm154 – P57M52r	28.4	41.9	[38]
KNSL, SLNS	H52 (T. dicoccoides) x Langdon	150	5A	P56M50m – P57M52a		38.8 (KNSL), 32.6 (SLNS)	[38]
TKW	H52 (T. dicoccoides) x Langdon	150	5A	P56M50m – P56M53c		24.9	[38]
TKW	H52 (T. dicoccoides) x Langdon	150	5B	gwm205 – gwm554	22.8	22.7	[38]
TKW	H52 (T. dicoccoides) x Langdon	150	5B	gwm371 – P57M53j	64.8	22.7	[38]
KNSL	H52 (T. dicoccoides) x Langdon	150	5B	gwm604 – P57M52y	135.1	11.4	[38]
TKW	H52 (T. dicoccoides) x Langdon	150	6B	gwm613 – P57M49p	0	12.2	[38]
SLNS	H52 (T. dicoccoides) x Langdon	150	6B	gwm88 – gwm626	74.2	7.5	[38]
KNS	H52 (T. dicoccoides) x Langdon	150	6B	gwm361 – gwm126b	74.9	16.3	[38]
SLNS	H52 (T. dicoccoides) x Langdon	150	6B	P57M49p – gwm58		7.5	[38]
TKW	H52 (T. dicoccoides) x Langdon	150	6B	P57M49p – gwm88		12.2	[38]
TKW	Svevo x WEW acc. Y12-3	208	1A	RAC875_c51346_99		1.7 - 5.7	[39]
TKW	Svevo x WEW acc. Y12-3	208	1B	IWB8257	43.5	3.4 - 6.2	[39]
TKW	Svevo x WEW acc. Y12-3	208	1B	IACX9183	82.7	6.3	[39]
TKW	Svevo x WEW acc. Y12-3	208	2A	IWB9878	50.5	1.4 -12.9	[39]
TKW	Svevo x WEW acc. Y12-3	208	2A	IWB65467	139.5	5.2 -9.5	[39]
TKW	Svevo x WEW acc. Y12-3	208	3A	IWB8477	54.7	1.1 - 4.7	[39]
TKW	Svevo x WEW acc. Y12-3	208	4A	IWA568*	69.3	3.3 - 4.8	[39]
TKW	Svevo x WEW acc. Y12-3	208	4B	IWB20500	62.8	2.8 - 13.2	[39]
TKW	Svevo x WEW acc. Y12-3	208	5A	IWA5040	146.5	3.1 - 10.2	[39]
TKW	Svevo x WEW acc. Y12-3	208	6A	IWB8452	3	9 - 9.2	[39]
TKW	Svevo x WEW acc. Y12-3	208	7B	IWB58302	90.1	0.7 - 6.9	[39]
TKW	Svevo x Zavitan	137	1A	IWA2056		5.9	[40]
TKW	Svevo x Zavitan	137	1B	IWB20542	43	20.9	[40]
TKW	Svevo x Zavitan	137	2A	IWB50818		6.8	[40]
TKW	Svevo x Zavitan	137	3A	IWB53527 - IWB52086	65.9	11.1	[40]
TKW	Svevo x Zavitan	137	3B	IWB7540	169.5	8.5	[40]
TKW	Svevo x Zavitan	137	4B	IWB72369, IWB72367	60.4	6 - 13.1	[40]
TKW	Svevo x Zavitan	137	5A	IWB686	158.9	9.5	[40]
TKW	Svevo x Zavitan	137	5A	IWB42031 - IWB25205	163.2	9.3	[40]
TKW	Svevo x Zavitan	137	5B	IWB33375	43.24	5.6	[40]
TKW	Svevo x Zavitan	137	6A	IWB31050	60.5	8.3	[40]
TKW	Svevo x Zavitan	137	6B	IWB19912	48.45	5.3	[40]
TKW	Svevo x Zavitan	137	6B	IWB72854	57	6.1	[40]
SNM	Kofa x Svevo	249	1A	gwm633	112.4	8.3	[41]
TKW	Kofa x Svevo	249	1A	cfa2147	116.5	5.9	[41]
KNM	Kofa x Svevo	249	1A	cfa2219		8.2	[41]
KNM, TKW	Kofa x Svevo	249	1B	gwm762	43.4	4.2 (KNM), 2.6 (TKW)	[41]
SNM	Kofa x Svevo	249	1B	gwm131 – 1	54.2	6.2	[41]
KNM	Kofa x Svevo	249	1B	gpw93013	82.1	7.5	[41]
KNM	Kofa x Svevo	249	2A	wmc177	42.6	8.2	[41]
TKW	Kofa x Svevo	249	2A	cfa2201	53.6	4.7	[41]
TKW	Kofa x Svevo	249	2B	gwm846	185	13.5	[41]
KNM	Kofa x Svevo	249	2B	gwm1070	185.8	7.8	[41]
SNM, TKW	Kofa x Svevo	249	3A	cfa2193	132.5	5.2 (SNM), 20.2 (TKW)	[41]
KNM	Kofa x Svevo	249	3B	barc133	5	13	[41]
KNM	Kofa x Svevo	249	3B	barc133 – gwm493*	5	7.4	[41]
TKW	Kofa x Svevo	249	3B	gwm493	12.4	16.1	[41]
KNM, TKW	Kofa x Svevo	249	3B	gwm1015	79.3	6.7 (KNM), 5.4 (TKW)	[41]
KNM	Kofa x Svevo	249	3B	barc115	122.5	4.9	[41]
SNM	Kofa x Svevo	249	4A	cfd31 – gwm1694	139.4	5.1	[41]
KNM	Kofa x Svevo	249	4B	wmc710	21.7	5.2	[41]
SNM	Kofa x Svevo	249	4B	gwm1084	78.5	7.3	[41]
KNM, TKW	Kofa x Svevo	249	4B	gwm6 – cfd54	93.6	18.8 (KNM), 3.6 (TKW)	[41]
TKW	Kofa x Svevo	176	4B	gwm6	93.6	3.6	[41]
KNM	Kofa x Svevo	249	5A	gwm156	81.7	6.2	[41]
SNM	Kofa x Svevo	249	5A	barc141	87.9	6.6	[41]
KNM	Kofa x Svevo	249	5A	ksum24 – gwm1570		3.3	[41]
KNM	Kofa x Svevo	249	5B	barc74	55.7	4.5	[41]
TKW	Kofa x Svevo	249	5B	dupw205	62.9	5.7	[41]
TKW	Kofa x Svevo	249	6A	gwm356	59.3	32.6	[41]
TKW	Kofa x Svevo	249	6B	barc14	48.2	3.9	[41]
KNM	Kofa x Svevo	249	6B	gwm219	116.8	10.1	[41]
TKW	Kofa x Svevo	249	7A	gwm1187 – gwm60	24	4.4	[41]
SNM	Kofa x Svevo	249	7A	wmc488*		7.5	[41]
TKW	Kofa x Svevo	249	7B	GWM569	3.4	3.3	[41]
KNM, SNM	Kofa x Svevo	249	7B	barc1005	12.3	7.3 (KNM), 7.2 (SNM)	[41]
KNM	Kofa x Svevo	249	7B	barc32*	188	4.1	[41]
KNS, TKW, GY	Modern and old durum cultivars, durum landraces, domesticated and wild type	233	1A	IWB57483 - IWB48626	50.4	7.8 (KNS), 5.4 (TKW), 3.1 (GY)	[42]
TKW	Modern and old durum cultivars, durum landraces, domesticated and wild type	233	1B	IWB46333	57.6	5.6	[43]
TKW, GY	Modern and old durum cultivars, durum landraces, domesticated and wild type	233	1B	IWB66475	152	5 (TKW), 5.5 (GY)	[43]
KNS, TKW	Modern and old durum cultivars, durum landraces, domesticated and wild type	233	2A	IWB46763 - IWB27389	114.7	7.4 (KNS), 7.3 (TKW)	[43]
KNS, TKW	Modern and old durum cultivars, durum landraces, domesticated and wild type	233	2A	IWB1937	181.2	6.3 (KNS), 3.7 (TKW)	[43]
KNS, TKW	Modern and old durum cultivars, durum landraces, domesticated and wild type	233	2B	IWB2285	73.7	4.1 (KNS), 4.8 (GYS)	[43]
TKW	Modern and old durum cultivars, durum landraces, domesticated and wild type	233	3B	IWB47344	148.4	5.5	[43]
KNS, GY	Modern and old durum cultivars, durum landraces, domesticated and wild type	233	3B	IWB55725	186.6	6.4 (KNS), 2.8 (GY)	[43]
TKW	Modern and old durum cultivars, durum landraces, domesticated and wild type	233	4A	IWB55207	61.2	4.5	[43]
KNS, GY	Modern and old durum cultivars, durum landraces, domesticated and wild type	233	4A	IWB71701	170.9	6.4 (KNS), 2.8 (GY)	[43]
TKW	Modern and old durum cultivars, durum landraces, domesticated and wild type	233	4B	IWB4448	109.1	5.5	[43]
TKW, GY	Modern and old durum cultivars, durum landraces, domesticated and wild type	233	5A	IWB43705 - IWB35357	14.3	5.5 (TKW), 6.1 (GY)	[43]
TKW, GY	Modern and old durum cultivars, durum landraces, domesticated and wild type	233	5A	IWB11637 - IWB71420	70.8	6.3 (TKW), 4.1 (GY)	[43]
TKW, GY	Modern and old durum cultivars, durum landraces, domesticated and wild type	233	5A	IWB12854 - IWB11972	111.5 - 114.3	3.7 (TKW), 5.5 (GY)	[43]
TKW, GY	Modern and old durum cultivars, durum landraces, domesticated and wild type	233	5B	IWB66934	82	3.9 (TKW), 9.4 (GY)	[43]
TKW, GY	Modern and old durum cultivars, durum landraces, domesticated and wild type	233	6A	IWB23313	0.1	3.1 (TKW), 5.2 (GY)	[43]
KNS, GY	Modern and old durum cultivars, durum landraces, domesticated and wild type	233	6A	IWB24036	13.9	6.5 (KNS), 5.4 (GY)	[43]
KNS, GY	Modern and old durum cultivars, durum landraces, domesticated and wild type	233	6A	IWB38787	52.6	5.3 (KNS), 4.8 (GY)	[43]
TKW	Modern and old durum cultivars, durum landraces, domesticated and wild type	233	6B	IWB45190	38.2	3.9	[43]
TKW	Modern and old durum cultivars, durum landraces, domesticated and wild type	233	6B	IWB34014	105.5	5.5	[43]
KNS, GY	Modern and old durum cultivars, durum landraces, domesticated and wild type	233	7A	IWB21281	134.1	4.7 (KNS), 6 (GY)	[43]
TKW	Modern and old durum cultivars, durum landraces, domesticated and wild type	233	7A	IWB33997	189.5	6.4	[43]
TKW, GY	Modern and old durum cultivars, durum landraces, domesticated and wild type	233	7B	IWB12937	73.4	3 (TKW), 3.5 (GY)	[43]
TKW, GY	Modern and old durum cultivars, durum landraces, domesticated and wild type	233	7B	IWB60564	104.7	3.4 (TKW), 6 (GY)	[43]
KNS	UC1113 x Kofa	93	1A	Bla – wmc95	10.6	22	[44]
KNS, SLNS	UC1113 x Kofa	93	1A	wmc329 – wmc24	20.9	13.1 (KNS), 29.1(SLNS)	[44]
SLNS	UC1113 x Kofa	93	1A	wmc95 – wmc329	20.9	11.9	[44]
SLNS	UC1113 x Kofa	93	1A	wmc24 – barc148	28.1	12. 4 - 22.9	[44]
KNS	UC1113 x Kofa	93	1A	barc213 – cdo393	122.7	20.1	[44]
GY	UC1113 x Kofa	93	1B	wmc193 – barc8	0.3	9.9	[44]
TKW	UC1113 x Kofa	93	1B	wmc626 – wmc85	34.6	12.9	[44]
GY	UC1113 x Kofa	93	1B	wmc85 – BE500714_237	38.8	12.8	[44]
GY, SLNS	UC1113 x Kofa	93	1B	BE443797_436 – barc302	43.9	13.8 (GY), SLNS (12.5)	[44]
GY, SLNS, TKW	UC1113 x Kofa	93	1B	psr162 – wg241	76.7	9.9 (GY), 47.4 (SNLS), 19.1 (TKW)	[44]
KNSL	UC1113 x Kofa	93	2A	gwm71 – wmc401	40.1	10.5	[44]
TKW	UC1113 x Kofa	93	2A	gwm122 – barc309	74.6	13.7	[44]
KNSL, SLNS	UC1113 x Kofa	93	2B	wmc154 – cfa2201	30.8	17.9 (KNSL), 32.1 (SLNS)	[44]
GY, SLNS	UC1113 x Kofa	93	2B	cfa2201 – gwm429	53.6	23 (GY), 21.8 (SLNS)	[44]
GY	UC1113 x Kofa	93	2B	BM140538_39 – cnl158	56.5	12.6	[44]
PH, TKW	UC1113 x Kofa	93	2B	wmc361 – barc159	191.9	13.4 (PH), 17.3 (TKW)	[44]
SNM	UC1113 x Kofa	93	3A	wmc505 – barc356	52	17.3	[44]
GY, KNS	UC1113 x Kofa	93	3A	wmc428 – BF293500_113	93.8	18 (GY), 10.1 (KNS)	[44]
GY, KNS, KNSL	UC1113 x Kofa	93	3A	ksm28 – wmc428		15 (GY), 16.3 (KNS), 8.7-9.0 (KNSL)	[44]
PH, KNSL, TKW	UC1113 x Kofa	93	3B	barc147 – gwm493*	4.2	45 (PH), 17 (KNSL), 15.3 (TKW)	[44]
GY, KNS	UC1113 x Kofa	93	3B	gwm493 – cfd79	12.4	38 (GY), 20.3 (KNS)	[44]
PH, GY	UC1113 x Kofa	93	3B	cfd79 – ksm45	18.6	29.2 (PH), 23.9 (GY)	[44]
KNSL, TKW	UC1113 x Kofa	93	3B	gwm247 – gwm181	209.3	13.1 (KNSL), 11.9 (TKW)	[44]
PH	UC1113 x Kofa	93	4A	gwm192b – LpxA3	63.6	9.7	[44]
GY	UC1113 x Kofa	93	4A	wmc617a – dupw4	78.5	6.3	[44]
GY, KNSL	UC1113 x Kofa	93	4A	dupw4 – barc170	88.9	14.3 (GY), 11 (KNSL)	[44]
KNS, SLNS	UC1113 x Kofa	93	4A	gwm265 – wmc258	98.2	12.2 (KNS), 8.8 (SLNS)	[44]
GY	UC1113 x Kofa	93	4A	barc343 – barc78	143	11.2	[44]
PH, SLNS	UC1113 x Kofa	93	4A	wmc258 – wmc718		15 (PH), 14.6 (SLNS)	[44]
KNSL, SNM	UC1113 x Kofa	93	4B	gwm540 – gwm495	53.8	16.2 (KNSL), 19 (SNM)	[44]
GY	UC1113 x Kofa	93	4B	cfd39 – wmc47	82.3	17.6	[44]
KNS, SLNS	UC1113 x Kofa	93	4B	ksm62 – gwm113		19.8 (KNS), 12.4 (SLNS)	[44]
SLNS	UC1113 x Kofa	93	5A	gwm293 – wg341b	46.9	9.4	[44]
PH	UC1113 x Kofa	93	5A	barc151 – BG607308_101	126.8	17.5- 20.5	[44]
PH	UC1113 x Kofa	93	5A	BG607308_101 – barc355	163.4	11.1	[44]
PH	UC1113 x Kofa	93	5A	gwm179 – wmc727	191.2	18.4	[44]
KNSL, TKW	UC1113 x Kofa	93	5A	gwm120 – gwm293		22.9 (KNSL), 15.2 (TKW)	[44]
SLNS	UC1113 x Kofa	93	5A	wg341b – barc1182		32.5	[44]
TKW	UC1113 x Kofa	93	5A	gwm47 – gwm120		17.5	[44]
GY	UC1113 x Kofa	93	5B	gwm234 – wmc149	0	8.5	[44]
TKW	UC1113 x Kofa	93	5B	BE495277_339 – gwm408b	93.5	14.8	[44]
SLNS	UC1113 x Kofa	93	6A	barc1165 – barc113	63.2	19	[44]
GY	UC1113 x Kofa	93	6A	barc113 – wmc553	73.6	6.3	[44]
SNM	UC1113 x Kofa	93	6A	barc104 – cfd2	109.4	14.3	[44]
TKW	UC1113 x Kofa	93	6B	barc198 – wmc105	73.4	15	[44]
TKW	UC1113 x Kofa	93	6B	wmc105 – barc354	74.1	15.9	[44]
KNSL	UC1113 x Kofa	93	6B	barc354 – barc79	89.5	9.4	[44]
KNS	UC1113 x Kofa	93	6B	barc79 – wg341a	91.8	9.9	[44]
TKW	UC1113 x Kofa	93	6B	wg341a – gwm219		11.7	[44]
KNS, SNM	UC1113 x Kofa	93	7A	barc174 – barc1034	90	9.8 (KNS), 24.4 (SNM)	[44]
SLNS	UC1113 x Kofa	93	7A	barc219 – barc282		23.1	[44]
TKW	UC1113 x Kofa	93	7B	barc279 – gwm537	8.3	11.6	[44]
TKW	UC1113 x Kofa	93	7B	gwm333 – BF474379_496	86.2	12	[44]
KNSL	UC1113 x Kofa	93	7B	barc278 – BE498985_42	112.5	11.5	[44]
TKW	UC1113 x Kofa	93	7B	wmc195 – wmc311	122.6	39.7	[44]
SLNS	UC1113 x Kofa	93	7B	barc1073 – barc340	188.7	14.3	[44]
GY	UC1113 x Kofa	93	7B	barc1005 – wmc606		12.2	[44]
TKW	collection of elite accessions from Mediterranean countries, Southwestern USA and Mexico	189	1A	wmc469	46	2.1–7.4	[45]
TKW, KNM	collection of elite accessions from Mediterranean countries, Southwestern USA and Mexico	189	1A	barc213	122.7	2.0–6.8 (TKW), 1.7–4.1 (KNM)	[46]
TKW, KNM	collection of elite accessions from Mediterranean countries, Southwestern USA and Mexico	189	1A	barc287	150.3	2.1–3.9 (TKW), 1.9–5.9 (KNM)	[46]
TKW, KNM	collection of elite accessions from Mediterranean countries, Southwestern USA and Mexico	189	1B	cfd65	36.7	2.4–2.8 (TKW), 1.9–4.8 (KNM)	[46]
GY	collection of elite accessions from Mediterranean countries, Southwestern USA and Mexico	189	1B	cfa2086	201.1	4.9–5.6	[46]
TKW, PH, KNM	collection of elite accessions from Mediterranean countries, Southwestern USA and Mexico	189	2A	gwm294	154.1	3.7–8.1 (TKW), 3.9–6.2 (PH), 2.7–7.5 (KNM)	[46]
TKW, GY	collection of elite accessions from Mediterranean countries, Southwestern USA and Mexico	189	2B	gwm410.1	60.1	3.2–5.9 (TKW), 4.3-5.9 (GY)	[46]
TKW, PH, KNM	collection of elite accessions from Mediterranean countries, Southwestern USA and Mexico	189	2B	gwm47.1	138.2	1.4–5.3 (TKW), 2.2–5.9 (PH), 1.9–5.0 (KNM)	[46]
TKW, KNM	collection of elite accessions from Mediterranean countries, Southwestern USA and Mexico	189	3A	cfa2234	65	1.7–3.9 (TKW), 2.3–3.0 (KNM)	[46]
GY, PH	collection of elite accessions from Mediterranean countries, Southwestern USA and Mexico	189	3B	gwm493	12.4	2.1–3.4 (GY), 1.7–3.1 (PH)	[46]
TKW, GY, KNM, PH	collection of elite accessions from Mediterranean countries, Southwestern USA and Mexico	189	4B	gwm1278	33.2	1.9–4.2 (TKW), 1.2 –3.0 (GY), 1.4–2.2 (KNM), 1.8–3.2 (PH)	[46]
TKW, KNM	collection of elite accessions from Mediterranean countries, Southwestern USA and Mexico	189	5A	barc303	44.9	0.9–5.0 (TKW), 2.0–5.9 (KNM)	[46]
GY, KNM	collection of elite accessions from Mediterranean countries, Southwestern USA and Mexico	189	5A	barc197	96.3	2.5–4.2 (GY), 2.3–4.3 (KNM)	[46]
TKW, KNM	collection of elite accessions from Mediterranean countries, Southwestern USA and Mexico	189	5A	gwm1570	134.5	2.2–6.9 (TKW), 1.8–5.5 (KNM)	[46]
GY	collection of elite accessions from Mediterranean countries, Southwestern USA and Mexico	189	6A	wmc256		1.5–4.7	[46]
TKW, KNM, PH, GY	collection of elite accessions from Mediterranean countries, Southwestern USA and Mexico	189	6B	dupw217	3.1	1.6–5.2 (TKW), 1.5–4.6 (KNM), 1.3–5.6 (PH), 1.8–4.2 (GY)	[46]
GY, PH, KNM	collection of elite accessions from Mediterranean countries, Southwestern USA and Mexico	189	6B	barc14	48.2	2.1–3.9 (GY), 2.3–4.4 (PH), 1.8–2.7 (KNM)	[46]
TKW, KNM, GY	collection of elite accessions from Mediterranean countries, Southwestern USA and Mexico	189	7A	cfa2257	204.2	1.9–4.6 (TKW), 1.5–3.6 (KNM), 2.8 - 3.1 (GY)	[46]
TKW, KNM	collection of elite accessions from Mediterranean countries, Southwestern USA and Mexico	189	7B	gwm333	86.2	1.8–3.6 (TKW), 1.8–6.1 (KNM)	[46]
TKW	collection of elite accessions from Mediterranean countries, Southwestern USA and Mexico	189	7B	gwm577	179.6	1.4–4.0	[46]
KNM, PH, GY	collection of elite accessions from Mediterranean countries, Southwestern USA and Mexico	189	7B	wmc276	181.2	1.8–3.8 (KNM), 2.0–7.7 (PH), 2.0–4.8 (GY)	[46]
GY	Langdon x G18-16 (T dicoccoides)	150	2B	gwm374	87.9	15.5	[47]
GY, TKW	Langdon x G18-16 (T dicoccoides)	152	2B	wPt-0694	147	15.5 (GY), TKW (6.8)	[47]
GY	Langdon x G18-16 (T dicoccoides)	152	4A	wPt-7558	132	8	[47]
GY	Langdon x G18-16 (T dicoccoides)	152	4B	gwm857	49.8	6.6	[47]
GY	Langdon x G18-16 (T dicoccoides)	152	5A	wPt11519		9.2	[47]
GY, TKW	Langdon x G18-16 (T dicoccoides)	152	7B	gwm263		12.7 (GY), 11.8 (TKW)	[47]
PH	Omrabi5 x Belikh2	114	1A	Xwmc24	28.1	2.6	[48]
TKW	Ethiopian durum wheat landraces and modern varieties	318	1A	IWB43491	70.5	11.6	[48]
PH	Omrabi5 x Belikh2	114	2A	Xwmc177	42.6	2.5	[48]
SLNS	Omrabi5 x Belikh2	114	3B	Xbarc344	133	2.6	[48]
KNS	Omrabi5 x Belikh2	114	4A	Xwmc617	78.5	2.7	[48]
GY	Ethiopian durum wheat landraces	311	4A	IWB11778	81.5		[48]
SLNS	Omrabi5 x Belikh2	114	4A	Xbarc343	143	3.6	[48]
SLNS	Omrabi5 x Belikh2	114	7A	wmc607	140.6	2.8	[48]
KNS	Omrabi5 x Belikh2	114	7B	wmc476	73.4	2.8	[48]
TKW	Ben x PI 41025 (T dicoccum)	200	1A	IWA5435 - IWA3338	40.7	4.7	[49]
SLNS	Ben x PI 41025 (T dicoccum)	200	1B	barc119	27.4	6.2	[49]
TKW	Ben x PI 41025 (T dicoccum)	200	2B	IWA1217 – IWA652	100	8.3	[49]
PH	MAGIC (Neodur, Claudio, Colosseo, Rascon/2Tarro)	338	2B	IWB69270 – IWB69796	115	8.1	[49]
GY	MAGIC (Neodur, Claudio, Colosseo,Rascon/2Tarro)	338	2B	IWB69796 – IWA5411	115.5	5.8	[49]
PH	MAGIC (Neodur, Claudio, Colosseo, Rascon/2Tarro)	338	2B	iwb20922	122.2	6	[49]
SLNS	Ben x PI 41025 (T dicoccum)	200	3B	IWA3716 – IWA6201	57.7	6.2	[49]
TKW	Ben x PI 41025 (T dicoccum)	200	3B	IWA2462 – IWA4324	144.8	5.2	[49]
SLNS	Ben x PI 41025 (T dicoccum)	200	7A	IWA4910 – IWA5912	161.6	11.8	[49]
SLNS	Ben x PI 41025 (T dicoccum)	200	7B	IWA1089	16.7	7.4	[49]
KNS	Ethiopian durum wheat landraces and modern varieties	318	1A	IWB54442	41.3	5.2	[50]
TKW	Ethiopian durum wheat landraces and modern varieties	318	1A	IWB37094	60.9	12.9	[50]
KNS	Ethiopian durum wheat landraces and modern varieties	318	2A	IWB72435	108.8	5.2	[50]
KNS	Ethiopian durum wheat landraces and modern varieties	318	3A	IWB11993	141.5	5.1	[50]
SLNS	Ethiopian durum wheat landraces and modern varieties	318	4A	IWA4771	51.3	26	[50]
KNS	Ethiopian durum wheat landraces and modern varieties	318	4A	IWB54755	161.7	8.7	[50]
KNS	Ethiopian durum wheat landraces and modern varieties	318	4B	IWB6722	0.3	4.1	[50]
KNS	Ethiopian durum wheat landraces and modern varieties	318	4B	IWB52318	53	9.6	[50]
TKW	Ethiopian durum wheat landraces and modern varieties	318	4B	IWB54627	70.4	10.3	[50]
KNS	Ethiopian durum wheat landraces and modern varieties	318	4B	IWB73113	87	8	[50]
KNS	Ethiopian durum wheat landraces and modern varieties	318	5A	IWA7361	14.3	7	[50]
TKW	Ethiopian durum wheat landraces and modern varieties	318	5A	IWA6412	44.9	6.8	[50]
KNS	Ethiopian durum wheat landraces and modern varieties	318	5A	IWB73502	142.8	6.2	[50]
TKW	Ethiopian durum wheat landraces and modern varieties	318	5B	IWB1005	38.2	12.4	[50]
TKW	Ethiopian durum wheat landraces and modern varieties	318	5B	IWB58629	41.3	4.7	[50]
KNS	Ethiopian durum wheat landraces and modern varieties	318	5B	IWB12549	43.4	0.1	[50]
TKW	Ethiopian durum wheat landraces and modern varieties	318	6A	IWB69648	84.9	7.7	[50]
KNS	Ethiopian durum wheat landraces and modern varieties	318	7A	IWB11840	94.7	5.2	[50]
TKW	(Omrabi5/ PI600545 (T. dicoccoides)) x Omrabi5	114	4B	McttEagg213		2	[51]
TKW	(Omrabi5/ PI600545 (T. dicoccoides)) x Omrabi5	114	6B	gwm518	51.2	12	[51]
TKW	(Omrabi5/ PI600545 (T. dicoccoides)) x Omrabi5	114	6B	gwm582a		20	[51]
PH	02-5B-318 x Saragolla	135	3A	IWB73247-IWB53051	41.6	11	[52]
PH	02-5B-318 x Saragolla	135	3B	IWB42624-IWB72177		19	[52]
PH	02-5B-318 x Saragolla	135	4B	IWB23940-IWB54727	34.4	29	[52]
PH	02-5B-318 x Saragolla	135	4B	IWB65850-IWB74036	51.8	19	[52]
SLNS	Durum Wheat Landraces, subsp. durum, turgidum and dicoccum	183	1B	wPt-8168	50.3	2.0 - 5.0	[53]
PH	Durum Wheat Landraces, subsp. durum, turgidum and dicoccum	183	1B	tPt-5080		4.0 - 7.0	[53]
SLNS	Durum Wheat Landraces, subsp. durum, turgidum and dicoccum	183	3A	wPt-2202	107.4	3.0 - 4.0	[53]
PH	Durum Wheat Landraces, subsp. durum, turgidum and dicoccum	183	5A	wPt-4419		9.0 - 13	[53]
TKW	Durum Wheat Landraces, subsp. durum, turgidum and dicoccum	183	7A	wPt-4835		3.0 - 4.0	[53]
TKW	Durum Wheat Landraces, subsp. durum, turgidum and dicoccum	183	7B	wPt-0884	204	2.0 - 20	[53]
KNS	Ofanto x Cappelli	98	2A	3532866		13.7	[54]
KNS	Ofanto x Cappelli	98	2B	wPt-7004	164.8	25.8	[54]
KNS	Ofanto x Cappelli	98	2B	5325236		14.1	[54]
KNS	Ofanto x Cappelli	98	2B	4410489		18.5	[54]
KNSL	Ofanto x Cappelli	98	2B	3028596		12.6	[54]
SLNS	Ofanto x Cappelli	98	2B	1020393		12.5	[54]
KNS	Ofanto x Cappelli	98	3A	1166451		16.5	[54]
KNSL	Ofanto x Cappelli	98	3A	5371026		15	[54]
KNS	Ofanto x Cappelli	98	3B	2267290		13.7	[54]
KNSL	Ofanto x Cappelli	98	3B	3533183		14.4	[54]
SLNS	Ofanto x Cappelli	98	3B	1735063		17.7	[54]
KNS	Ofanto x Cappelli	98	4A	3024608		17	[54]
KNS	Ofanto x Cappelli	98	4B	4537971		12.9	[54]
KNSL	Ofanto x Cappelli	98	4B	Rht-B1		12.4	[54]
SLNS	Ofanto x Cappelli	98	4B	5567462		17.9	[54]
KNS	Ofanto x Cappelli	98	5A	1003869		18.6	[54]
KNSL	Ofanto x Cappelli	98	5A	1007490		13.6	[54]
KNS	Ofanto x Cappelli	98	5B	3959042		11.7	[54]
KNSL	Ofanto x Cappelli	98	5B	1072798		18.8	[54]
KNS	Ofanto x Cappelli	98	6A	1408556		16.6	[54]
KNSL	Ofanto x Cappelli	98	6A	3934210		13.7	[54]
KNS	Ofanto x Cappelli	98	6B	1123289		16.2	[54]
SLNS	Ofanto x Cappelli	98	6B	1699040		17.6	[54]
SLNS	Ofanto x Cappelli	98	6B	5325371		15.6	[54]
KNSL	Ofanto x Cappelli	98	7A	1215067		12.5	[54]
SLNS	Ofanto x Cappelli	98	7A	1212458		25.5	[54]
KNS	Ofanto x Cappelli	98	7B	1113456		18.6	[54]
SLNS	Ofanto x Cappelli	98	7B	1065475		32.4	[54]
SLNS	Ofanto x Cappelli	98	7B	3949256		14.8	[54]
SLNS	Ofanto x Cappelli	98	7B	1772284		20.4	[54]
SLNS	Ofanto x Cappelli	98	7B	5411613		15.1	[54]
KNS	Ofanto x Cappelli	98	1B	4260609		12.9	[55]
KW	Langdon x DIC-2A	94	2A	wmc794	56.4	38.2	[55]
KW	Langdon x DIC-2A	94	2A	hbg494	57.8	48.1	[55]
KL	Langdon x DIC-2A	94	2A	cfa2043	62.3	45.6	[55]
KL	Langdon x DIC-2A	94	2A	cfa2043		45.6	[55]
KW	Langdon x DIC-2A	94	2A	wmc794		38.2	[55]
TKW	Langdon x DIC-2A	94	2A	hbg494		48.1	[55]
GY	Ethiopian durum wheat landraces	311	1A	IWB6493 - IWB12954	148.3		[56]
PH	Simeto x Molise Colli (T dicoccum)	136	3A	IWB66127	38.1	17	[56]
PH	Simeto x Molise Colli (T dicoccum)	136	4B	IWB72203*	28.8	52	[56]
PH	Simeto x Molise Colli (T dicoccum)	136	6A	IWB65466	103	11	[56]
GY	MAGIC (Neodur, Claudio, Colosseo, Rascon/2Tarro)	338	2A	IWB34999 – IWB43067	107.7	4.5	[57]
TKW	Meridiano × Claudio	181	2A	wPt-2696*	211.5	3.5	[57]
TKW	Meridiano × Claudio	176	3A	IWB58806	147.3	9.6	[57]
TKW	Meridiano × Claudio	181	3B	wPt-2698	156.6	6.5	[57]
TKW	Meridiano × Claudio	181	4B	wmc89	41.9	12.5	[57]
TKW	Meridiano × Claudio	181	6A	IWB66509	45.2	3.4	[57]
GY	Ethiopian durum wheat landraces	311	1A	IWA6835 - IWB40291	68.9		[58]
GY	Ethiopian durum wheat landraces	311	1A	IWB64554	110.7		[58]
GY	Ethiopian durum wheat landraces	311	1A	IWA5317 - IWA6312	142.8		[58]
GY	Ethiopian durum wheat landraces	311	1B	IWB72495	20.5		[58]
PH	Ethiopian durum wheat landraces	311	1B	IWB6100	23.2		[58]
GY	Ethiopian durum wheat landraces	311	1B	IWB37294	37.1		[58]
GY	Ethiopian durum wheat landraces	311	1B	IWB7205	38.5		[58]
GY	Ethiopian durum wheat landraces	311	1B	IWB6787	39.9		[58]
GY	Ethiopian durum wheat landraces	311	1B	IWB12179	41.2		[58]
GY	Ethiopian durum wheat landraces	311	1B	IWB71800	43.5		[58]
GY	Ethiopian durum wheat landraces	311	2A	IWB54782	107.8		[58]
PH	Ethiopian durum wheat landraces	311	2A	IWB37862	154.6		[58]
GY	Ethiopian durum wheat landraces	311	2A	IWB11730	204.3		[58]
GY	Ethiopian durum wheat landraces	311	2A	IWA551	204.7		[58]
PH	Ethiopian durum wheat landraces	311	2A	IWB11171	206.8		[58]
KNS	Ethiopian durum wheat landraces	311	2B	IWB4596	14.5		[58]
GY	Ethiopian durum wheat landraces	311	2B	IWB63171	63.1		[58]
GY	Ethiopian durum wheat landraces	311	2B	IWB65460	69.9		[58]
GY	Ethiopian durum wheat landraces	311	3B	IWB4058	2.4		[58]
GY	Ethiopian durum wheat landraces	311	3B	IWB73916	7.4		[58]
GY	Ethiopian durum wheat landraces	311	3B	IWB62325	99.4		[58]
GY	Ethiopian durum wheat landraces	311	3B	IWB57606	138		[58]
PH	Ethiopian durum wheat landraces	311	3B	IWB64607	166		[58]
GY	Ethiopian durum wheat landraces	311	4A	IWA568*	69.3		[58]
GY	Ethiopian durum wheat landraces	311	4A	IWB9549	102.7		[58]
PH	Ethiopian durum wheat landraces	311	4A	IWB8782	114.6		[58]
GY	Ethiopian durum wheat landraces	311	4A	IWB32870	115.1		[58]
GY	Ethiopian durum wheat landraces	311	4A	IWB65650	129.5		[58]
PH	Ethiopian durum wheat landraces	311	4B	IWB73063	13.9		[58]
GY	Ethiopian durum wheat landraces	311	4B	IWB10761	70.1		[58]
PH	Ethiopian durum wheat landraces	311	5A	IWB69450	80.9		[58]
PH	Ethiopian durum wheat landraces	311	5A	IWB72017	199.6		[58]
GY	Ethiopian durum wheat landraces	311	5B	IWB982	100.3		[58]
PH	Ethiopian durum wheat landraces	311	5B	IWA1564	167.3		[58]
GY	Ethiopian durum wheat landraces	311	5B	IWB71488	167.6		[58]
GY	Ethiopian durum wheat landraces	311	6A	IWB69886	62		[58]
GY	Ethiopian durum wheat landraces	311	6A	IWB8049, IWB39623	71.8		[58]
PH	Ethiopian durum wheat landraces	311	6B	IWB28339	20.4		[58]
PH	Ethiopian durum wheat landraces	311	6B	IWB33571	71.9		[58]
GY	Ethiopian durum wheat landraces	311	6B	IWB63057	71.9		[58]
PH	Ethiopian durum wheat landraces	311	6B	IWB19680	93.4		[58]
PH	Ethiopian durum wheat landraces	311	6B	IWB73037	155.1		[58]
GY	Ethiopian durum wheat landraces	311	7A	IWB4527	2.4		[58]
GY	Ethiopian durum wheat landraces	311	7A	IWA810	137.8		[58]
GY	Ethiopian durum wheat landraces	311	7A	IWA6562	148.1		[58]
PH	Ethiopian durum wheat landraces	311	7B	IWB72917	92		[58]
GY	Ethiopian durum wheat landraces	311	7B	IWB65154	175.8		[58]
PH	MAGIC (Neodur, Claudio, Colosseo, Rascon/2Tarro)	338	1B	IWB66840 – IWB8804	47.1	3.8	[59]
PH	MAGIC (Neodur, Claudio, Colosseo, Rascon/2Tarro)	338	2A	IWB42945	47.2	11.4	[59]
GY	MAGIC (Neodur, Claudio, Colosseo, Rascon/2Tarro)	338	2A	IWB51686 – IWB70375	47.2	8.1	[59]
GY	MAGIC (Neodur, Claudio, Colosseo,Rascon/2Tarro)	338	2B	IWB7031 – IWB36011	19	5.2	[59]
GY	MAGIC (Neodur, Claudio, Colosseo,Rascon/2Tarro)	338	2B	IWB4604 – IWA3868	43	4.7	[59]
GY	MAGIC (Neodur, Claudio, Colosseo, Rascon/2Tarro)	338	3A	IWB20248 – IWB6370	128.7	4.3	[59]
PH	MAGIC (Neodur, Claudio, Colosseo, Rascon/2Tarro)	338	4A	IWB12737	110.9	5.3	[59]
PH	MAGIC (Neodur, Claudio, Colosseo, Rascon/2Tarro)	338	4A	IWB23377	156.9	4.7	[59]
PH	MAGIC (Neodur, Claudio, Colosseo, Rascon/2Tarro)	338	4B	IWB13072	6	4.1	[59]
GY	MAGIC (Neodur, Claudio, Colosseo,Rascon/2Tarro)	338	4B	IWB72802 – IWB73462	72.3	7.8	[59]
PH	MAGIC (Neodur, Claudio, Colosseo, Rascon/2Tarro)	338	5B	IWB3693 – IWB71533	114.9	4.6	[59]
PH	MAGIC (Neodur, Claudio, Colosseo, Rascon/2Tarro)	338	5B	IWB26671	167.3	5.4	[59]
PH	MAGIC (Neodur, Claudio, Colosseo, Rascon/2Tarro)	338	6A	IWB69987	94.5	5.6	[59]
PH	MAGIC (Neodur, Claudio, Colosseo, Rascon/2Tarro)	338	6A	IWB55508	124.8	5.3	[59]
PH	MAGIC (Neodur, Claudio, Colosseo, Rascon/2Tarro)	338	6B	IWB70710	61.1	3.5	[59]
GY	MAGIC (Neodur, Claudio, Colosseo,Rascon/2Tarro)	338	7A	IWA8390 – IWB72200	62.4	7.9	[59]
PH	MAGIC (Neodur, Claudio, Colosseo, Rascon/2Tarro)	338	7A	IWB67995 – IWB33919	68.7	7.8	[59]
GY	MAGIC (Neodur, Claudio, Colosseo,Rascon/2Tarro)	338	7A	IWB319 – IWB23989	82.2	8.8	[59]
GY	MAGIC (Neodur, Claudio, Colosseo,Rascon/2Tarro)	338	7A	IWB68677 – IWA2371	128.4	5.3	[59]
PH	MAGIC (Neodur, Claudio, Colosseo, Rascon/2Tarro)	338	7B	IWB10498 – IWA7330	132.7	3.7	[59]
TKW	Langdon x G18-16 (T dicoccoides)	152	1B	gwm1024		6.4	[60]
TKW	Langdon x G18-16 (T dicoccoides)	152	2A	tPt-3136		6.7	[60]
TKW	Langdon x G18-16 (T dicoccoides)	144	4A	gwm610	68.4	16.6	[60]
TKW	Langdon x G18-16 (T dicoccoides)	152	4B	gwm513	55.4	6.6	[60]
TKW	Langdon x G18-16 (T dicoccoides)	152	5A	wmc415	112.1	7	[60]
TKW	Langdon x G18-16 (T dicoccoides)	152	5B	gwm371	64.8	9.3	[60]
TKW	Langdon x G18-16 (T dicoccoides)	152	6A	gwm786	49.5	8	[60]
TKW	Langdon x G18-16 (T dicoccoides)	152	6B	barc136	66.4	16.8	[60]
TKW	Langdon x G18-16 (T dicoccoides)	152	6B	wPt-8554	104	16.8	[60]
TKW	Langdon x G18-16 (T dicoccoides)	152	7A	wPt-9555		5.1	[60]
KL	Simeto x Molise Colli (T. dicoccum)	136	1B	IWB6592	33.8	7.1	[61]
KL	Simeto x Molise Colli (T. dicoccum)	136	2B	IWB65469	30.5	7.2	[61]
KL	Simeto x Molise Colli (T. dicoccum)	136	2B	IWB42438	180.1	4.1	[61]
KL	Simeto x Molise Colli (T. dicoccum)	136	3A	IWB30522	142.2	11.8	[61]
TKW	Simeto x Molise Colli (T. dicoccum)	136	3B	IWB29048	44.6	15.3	[61]
KW	Simeto x Molise Colli (T. dicoccum)	136	3B	IWB63191	88	10	[61]
KW, TKW	Simeto x Molise Colli (T. dicoccum)	136	4B	IWB72203*	28.8	16.3 (KW), 19.8 (TKW)	[61]
KL	Simeto x Molise Colli (T. dicoccum)	136	7A	IWB66777	84.6	6.9	[61]
TKW	Langdon x G18-16 (T dicoccoides)	150	2A	tpt-8937 – wPt8115		9.4	[62]
TKW	Langdon x G18-16 (T dicoccoides)	150	3A	gwn751 – gwn494		6	[62]
TKW	Langdon x G18-16 (T dicoccoides)	150	4A	gwm610 – DuPw004	68.4	7.9	[62]
TKW	Langdon x G18-16 (T dicoccoides)	150	5A	gwn1236 – wnc415a		15.4	[62]
TKW	worldwide collection	150	5B	AY244508_5_B_Y_26		11.1	[62]
TKW	Langdon x G18-16 (T dicoccoides)	150	6B	wPt-7935 – wPt11556	29.1	12.5	[62]
SLNS	worldwide collection	493	1A	IWA4021		2.81701	[63]
SLNS	worldwide collection	493	1B	IWA6890	38.8	2.60313	[63]
SLNS	worldwide collection	493	2A	IWA4441	37.8	2.6868	[63]
PH	worldwide collection	493	2A	IWA2370	181.2	2.6016	[63]
PH	worldwide collection	493	2A	IWA3431		2.68979	[63]
KL	worldwide collection	493	3A	IWA7771	7.3	3.01502	[63]
KW	worldwide collection	493	3A	IWA5039	64.3	3	[63]
KW	worldwide collection	493	3A	IWA2069	66.3	3.03804	[63]
KW	worldwide collection	493	3A	IWA5616	66.3	3.02291	[63]
SLNS, KW	worldwide collection	493	3A	IWA2023		4.7 (SLNS), 4.4 (KW)	[63]
KL	worldwide collection	493	3B	IWA537	87.1	2.81802	[63]
SLNS	worldwide collection	493	3B	IWA2782	98.2	3.04519	[63]
SLNS	worldwide collection	493	4A	IWA6911	52.2	2.82332	[63]
SLNS	worldwide collection	493	4A	IWA2816	136.3	4.68613	[63]
KW	worldwide collection	493	4A	IWA7322	150.8	2.77669	[63]
PH	worldwide collection	493	4B	IWA4854	38.4	6.10681	[63]
SLNS	worldwide collection	493	5A	IWA14	15.6	2.72364	[63]
PH	worldwide collection	493	5A	IWA6456	120.6	2.74173	[63]
SLNS	worldwide collection	493	5A	IWA7044	157	3.60946	[63]
SLNS	worldwide collection	493	5A	IWA7043	157	3.14485	[63]
SLNS	worldwide collection	493	5A	IWA2412	159.5	2.68253	[63]
SLNS	worldwide collection	493	5B	IWA5217	71.6	3.17204	[63]
KL	worldwide collection	493	6A	IWA1262		3.34948	[63]
SLNS	worldwide collection	493	6B	IWA1743		3.16803	[63]
SLNS	worldwide collection	493	7A	IWA4364	192.6	2.59067	[63]
KL	worldwide collection	493	7A	IWA4363	192.6	3.69751	[63]
PH	worldwide collection	150	1A	BE490041_1_A_371		7.5 - 7.7	[64]
TKW	worldwide collection	150	1B	BE495786_1_B_108		6.9	[64]
SLNS	worldwide collection	150	1B	BG274294_1_B_382		5.4	[64]
TKW	worldwide collection	150	2A	BG605368_2_A_Y_310		9.7	[64]
PH, SLNS	worldwide collection	150	2A	BE443948_2_A_Y_345		7 - 7.3 (PH), 7.1 (SLNS)	[64]
SLNS	worldwide collection	150	2A	BE426620_2_A_Y_420		9.8	[64]
SLNS	worldwide collection	150	2B	BE444144_2_B_92		8.06	[64]
SLNS	worldwide collection	150	2B	BE444144_2_B_N_138		5.03	[64]
SLNS	worldwide collection	150	2B	BE445278_2_B_143		8.92	[64]
SLNS	worldwide collection	150	3A	BE495175_3_A_Y_317		5.5	[64]
SLNS	worldwide collection	150	3A	BE585797_3_A_Y_283		9.5	[64]
SLNS	worldwide collection	150	3A	BG314551_3_A_Y_162		8.1 - 8.4	[64]
TKW	worldwide collection	150	4A	BE425301_4_A_Y_160		6.62	[64]
SLNS	worldwide collection	150	4A	BE404717_4_A_Y_280		7.76	[64]
SLNS	worldwide collection	150	5A	AJ612027_5_A_Y_238		7.4	[64]
SLNS	worldwide collection	150	5A	AJ612027_5_A_Y_473		7.4	[64]
SLNS	worldwide collection	150	5A	BE404341_5_A_Y_258		10.7	[64]
SLNS	worldwide collection	150	5A	BE495277_5_A_Y_427		9.4	[64]
SLNS	worldwide collection	150	5A	BF293620_5_A_Y_246		10.7	[64]
TKW	worldwide collection	150	6A	CD454448_6_A_84		5.4	[64]
PH	worldwide collection	150	6A	BG312827_6_A_Y_305		5.2 - 7.8	[64]
SLNS	worldwide collection	150	6A	BQ166748_6_A_N_149		6.1	[64]
TKW	worldwide collection	150	6B	BE445667_6_B_Y_285		6.9	[64]
PH	worldwide collection	150	6B	BF475120_6_B_Y_75		7.2 - 9.4	[64]
PH	worldwide collection	150	6B	BF475120_6_B_67		7.2 - 9.6	[64]
SLNS	worldwide collection	150	7A	BE590553_7_A_190		8.3	[64]
SLNS	worldwide collection	150	7A	BQ169501_7_A_Y_296		7.7	[64]
TKW	worldwide collection	150	7B	BE637476_7_B_N_544		9.45	[64]
SLNS	worldwide collection	150	7B	BE445506_7_B_Y_152		14	[64]
SLNS	worldwide collection	150	7B	BF200891_7_B_80		7.4	[64]
SLNS	worldwide collection	150	7B	BF485380_7_B_Y_375		7.7	[64]

## Sheet: Supp. Table 2
Trait	Cross/population	Chr	Peak marker, interval marker	Pos (cM)	R2(%)	Conditions	Reference
PH	CIMMYT gene bank accessions	1A	39591681	117	5.3	YP, DS and HS	[7]
PH	CIMMYT gene bank accessions	1A	12797761	136	5.8	YP, DS and HS	[7]
GY	CIMMYT gene bank accessions	1B	10571121	6	8.7	YP, DS and HS	[7]
GY	CIMMYT gene bank accessions	1B	79200771	8	5.9	YP, DS and HS	[7]
GY	CIMMYT gene bank accessions	1B	39387101	71	7.1	YP, DS and HS	[7]
PH	CIMMYT gene bank accessions	1B	39402891	262	6.9	YP, DS and HS	[7]
PH	CIMMYT gene bank accessions	1B	49096071	269	6.6	YP, DS and HS	[7]
KNM	CIMMYT gene bank accessions	2A	49109041	54	6.6	YP, DS and HS	[7]
KNM	CIMMYT gene bank accessions	2A	1000311781	59	6.5	YP, DS and HS	[7]
TKW	CIMMYT gene bank accessions	2A	10777081	66	6.8 - 10.5	YP, DS and HS	[7]
TKW	CIMMYT gene bank accessions	2A	10059301	69	5.7 - 7.4	YP, DS and HS	[7]
TKW	CIMMYT gene bank accessions	2A	1000357061	70	6.2 - 7.4	YP, DS and HS	[7]
PH	CIMMYT gene bank accessions	2B	49098821	79	12.1	YP, DS and HS	[7]
TKW	CIMMYT gene bank accessions	2B	1000328141	82	6.5	YP, DS and HS	[7]
PH	CIMMYT gene bank accessions	3A	1000403201	9	8.7	YP, DS and HS	[7]
PH	CIMMYT gene bank accessions	3B	1000317001	156	7.2	YP, DS and HS	[7]
PH	CIMMYT gene bank accessions	4B	97247651	31	7.8 - 11.6	YP, DS and HS	[7]
PH	CIMMYT gene bank accessions	4B	1000134441	32	10.3	YP, DS and HS	[7]
GY	CIMMYT gene bank accessions	5A	9798261	64	5.17	YP, DS and HS	[7]
TKW	CIMMYT gene bank accessions	5B	11033111	48	5.6	YP, DS and HS	[7]
PH	CIMMYT gene bank accessions	5B	12172831	57	5.3	YP, DS and HS	[7]
KNM	CIMMYT gene bank accessions	5B	10911711	74	4.5	YP, DS and HS	[7]
GY	CIMMYT gene bank accessions	6A	22560731	86	5.4	YP, DS and HS	[7]
PH	CIMMYT gene bank accessions	6B	10648491	35	6.7	YP, DS and HS	[7]
KNM	CIMMYT gene bank accessions	7A	10956421	75	5.7	YP, DS and HS	[7]
PH	CIMMYT gene bank accessions	7A	13802321	88	7.5	YP, DS and HS	[7]
KNM	CIMMYT gene bank accessions	7B	10820041	36	4.9 - 5.8	YP, DS and HS	[7]
PH	CIMMYT gene bank accessions	7B	55820811	59	7	YP, DS and HS	[7]
PH	CIMMYT gene bank accessions	7B	11649091	127	5.5	YP, DS and HS	[7]
PH	CIMMYT gene bank accessions	7B	1000215721	129	6.4	YP, DS and HS	[7]
GY, PH	Kofa x Svevo	2B	Xgwm1027 - Xwmc361	155	3.5 - 12.4 (GY), 4.4 - 12.8 (PH)	WW and DS	[14]
GY, PH	Kofa x Svevo	3B	Xbarc133 - Xgwm493	10	4.8 - 18.1 (GY), 4.3 - 16.6 (PH)	WW and DS	[14]
GY	Omrabi5 x Belikh2	2A	Xgwm895	125	8 (D), 7(W)	WW and DS	[18]
PH	Omrabi5 x Belikh2	4B	Xbarc193	9.9	8 (W), 10 (D)	WW and DS	[18]
PH	Omrabi5 x Belikh2	4B	Xgwm925	24.01	9 (W), 10 (W)	WW and DS	[18]
TKW	Omrabi5 x Belikh2	5A	Xgwm1236	14.7	7 (D), 12 (W)	WW and DS	[18]
GY	Omrabi5 x Belikh2	7B	Xbarc276	219.1	8 (W), 9 (D)	WW and DS	[18]
TKW	Ostegata x Massara-1 (F2 and F3)	3B	Xbarc101		45.2 (D), 11.4 (W)	WW and DS	[33]
TKW	Ostegata x Massara-1 (F2 and F3)	6A	Xcfa2114		7.4 (D), 18.5 (W)	WW and DS	[33]
TKW	PDW233 x Bhalegaon 4	2A	Xgwm71.2–Xubc835.4		8 (D), 12.2 (W)	WW and DS	[35]
GY	PDW233 x Bhalegaon 4	2A	Xwmc177–Xwmc154.2		16.3 (D), 10.8 (W)	WW and DS	[35]
TKW	PDW233 x Bhalegaon 4	2B	Xgwm429–Xubc812.2		23.7 (D), 16.5-20.3 (W)	WW and DS	[35]
GY	Langdon x G18-16 (T dicoccoides)	2B	gwm374	87.9	13.1 (D), 15.5 (W)	WW and DS	[47]
GY	Langdon x G18-16 (T dicoccoides)	2B	wPt-0694	147	13.1 (D), 15.5 (W)	WW and DS	[47]
GY	Langdon x G18-16 (T dicoccoides)	4A	wPt-7558	132	4.2 (D), 8 (W)	WW and DS	[47]
GY	Langdon x G18-16 (T dicoccoides)	4B	gwm857	49.8	5.9 (D), 6.6 (W)	WW and DS	[47]
TKW	Kofa x Svevo	1A	Xgwm99 - Xcfa2147	104.1	4 - 10.6	WW and DS	[79]
TKW	Kofa x Svevo	2B	Xgwm846 - Xgwm1027	146.3	6.9 - 20.2	WW and DS	[79]
TKW	Kofa x Svevo	3B	Xbarc133 - Xgwm493	7.9	5.8 - 17.4	WW and DS	[79]
KNM	Kofa x Svevo	4B	Xgwm6–Xcfd54	106.5	4.9 - 15.2	WW and DS	[79]
GY	modern cultivars from a global collection	2A	AX-94538070		25	N and HS	[131]
KNS	modern cultivars from a global collection	3A	AX-95174625		27	N and HS	[131]
KNS	modern cultivars from a global collection	3B	AX-95247611		27	N and HS	[131]
